# Supplementary material for: Association between olive oil consumption and all-cause, cardiovascular and cancer mortality in adult subjects: a systematic review and meta-analysis
Source: Royal Society of Chemistry journal article supplement (doi:10.1039/d4fo04161e), 2024-01-01
Supplement: d4fo04161e1.pdf [file d4fo04161e1.pdf]

**Supplementary Table 1.** PRISMA 2020 checklist.

| <b>Section/topic</b>           | <b>Item n.º</b> | <b>Checklist item</b>                                                                                                                                                                                                                                                                                                             | <b>Item location</b> |
|--------------------------------|-----------------|-----------------------------------------------------------------------------------------------------------------------------------------------------------------------------------------------------------------------------------------------------------------------------------------------------------------------------------|----------------------|
| <b>TITLE</b>                   |                 |                                                                                                                                                                                                                                                                                                                                   |                      |
| <b>Title</b>                   | 1               | Identify the publication as a systematic review.                                                                                                                                                                                                                                                                                  | 1                    |
| <b>SUMMARY</b>                 |                 |                                                                                                                                                                                                                                                                                                                                   |                      |
| <b>Structured summary</b>      | 2               | See the checklist for structured summaries of the PRISMA 2020 statement (table 2).                                                                                                                                                                                                                                                | 2                    |
| <b>INTRODUCTION</b>            |                 |                                                                                                                                                                                                                                                                                                                                   |                      |
| <b>Justification</b>           | 3               | Describe the rationale for the review in the context of existing knowledge.                                                                                                                                                                                                                                                       | 3                    |
| <b>Objectives</b>              | 4               | Provide an explicit statement of the objectives or questions addressed by the review.                                                                                                                                                                                                                                             | 3                    |
| <b>METHODS</b>                 |                 |                                                                                                                                                                                                                                                                                                                                   |                      |
| <b>Eligibility criteria</b>    | 5               | Specify the inclusion and exclusion criteria for the review and how studies were grouped for the synthesis.                                                                                                                                                                                                                       | 4-5                  |
| <b>Sources of information</b>  | 6               | Specify all databases, registers, websites, organisations, reference lists and other search or query resources to identify studies. Especifique la fecha en la que cada recurso se buscó o consultó por última vez.                                                                                                               | 4                    |
| <b>Search strategy</b>         | 7               | Submit full search strategies for all databases, registers and websites, including any filters and limits used.                                                                                                                                                                                                                   | 4, Table S3          |
| <b>Study selection process</b> | 8               | Specify the methods used to decide whether a study meets the review's inclusion criteria, including how many review authors screened each record and each retrieved publication, whether they worked independently and, if applicable, details of the automation tools used in the process.                                       | 4-5                  |
| <b>Data extraction process</b> | 9               | Indicate the methods used to extract data from reports or publications, including how many reviewers collected data from each publication, whether they worked independently, the processes for obtaining or confirming data by the study investigators, and, if applicable, details of any automation tools used in the process. | 5                    |
| <b>List of data</b>            | 10a             | List and define all outcomes for which data were sought. Specify whether all outcomes compatible with each outcome domain were sought (e.g. for all measurement scales, time points, analyses) and, if not, the methods used to decide which outcomes to collect.                                                                 | 5-6                  |
|                                | 10b             | List and define all other variables for which                                                                                                                                                                                                                                                                                     | 5-6                  |

|                                                      |     |                                                                                                                                                                                                                                                                                                                                                                                                                                               |              |
|------------------------------------------------------|-----|-----------------------------------------------------------------------------------------------------------------------------------------------------------------------------------------------------------------------------------------------------------------------------------------------------------------------------------------------------------------------------------------------------------------------------------------------|--------------|
| <b>Risk of bias assessment of individual studies</b> | 11  | data were sought (e.g. participant and intervention characteristics, funding sources). Describe all assumptions made about any missing or uncertain information. Specify the methods used to assess the risk of bias of the included studies, including details of the tools used, how many review authors assessed each study and whether they worked independently and, if applicable, details of the automation tools used in the process. | 5            |
| <b>Measures of effect</b>                            | 12  | Specify, for each outcome, the measures of effect (e.g. risk ratio, mean difference) used in the synthesis or presentation of results.                                                                                                                                                                                                                                                                                                        | 5-6          |
|                                                      | 13a | Describe the process used to decide which studies were eligible for each synthesis (e.g. by tabulating the characteristics of the intervention studies and comparing them with the intended groups for each synthesis (item 5).                                                                                                                                                                                                               | 5-6          |
|                                                      | 13b | Describe any methods required to prepare data for presentation or synthesis, such as handling missing data in summary statistics or data conversions.                                                                                                                                                                                                                                                                                         | 5-6          |
| <b>Synthesis methods</b>                             | 13c | Describe the methods used to tabulate or visually present the results of individual studies and their synthesis.                                                                                                                                                                                                                                                                                                                              | 9-10         |
|                                                      | 13d | Describe the methods used to synthesise the results and justify your choices. If a meta-analysis has been performed, describe the models, the methods for identifying the presence and extent of statistical heterogeneity, and the software used.                                                                                                                                                                                            | 6            |
|                                                      | 13e | Describe the methods used to explore possible causes of heterogeneity among study results (e.g. subgroup analysis, meta-regression).                                                                                                                                                                                                                                                                                                          | 6            |
|                                                      | 13f | Describe the sensitivity analyses that have been performed to assess the robustness of the synthesis results.                                                                                                                                                                                                                                                                                                                                 | 6            |
| <b>Assessment of publication bias</b>                | 14  | Describe the methods used to assess the risk of bias due to missing results in a synthesis (arising from publication biases).                                                                                                                                                                                                                                                                                                                 | 6            |
| <b>Assessing the certainty of the evidence</b>       | 15  | Describe the methods used to assess the certainty (or confidence) in the body of evidence for each outcome.                                                                                                                                                                                                                                                                                                                                   | NA           |
| <b>RESULTS</b>                                       |     |                                                                                                                                                                                                                                                                                                                                                                                                                                               |              |
| <b>Selection of studies</b>                          | 16a | Describe the results of the search and screening processes, from the number of records identified in the search to the number                                                                                                                                                                                                                                                                                                                 | 6, Figure S1 |

|                                           |     |                                                                                                                                                                                                                                                                                                                       |               |
|-------------------------------------------|-----|-----------------------------------------------------------------------------------------------------------------------------------------------------------------------------------------------------------------------------------------------------------------------------------------------------------------------|---------------|
|                                           |     | of studies included in the review, ideally using a flow chart (see figure 1).                                                                                                                                                                                                                                         |               |
|                                           | 16b | Cite studies that apparently met the inclusion criteria but were excluded, and explain why they were excluded.                                                                                                                                                                                                        | 6, Figura S1  |
| <b>Characteristics of the studies</b>     | 17  | Cite each study included and present its characteristics.                                                                                                                                                                                                                                                             | 6-7, Table 1  |
| <b>Risk of bias of individual studies</b> | 18  | Present the risk of bias assessments for each of the included studies.                                                                                                                                                                                                                                                | 7, Table S4   |
| <b>Results of individual studies</b>      | 19  | Present, for all outcomes and for each study: (a) summary statistics for each group (if applicable) and (b) the effect estimate and its precision (e.g. credible or confidence interval), ideally using structured tables or graphs.                                                                                  | 7-8, Figure 1 |
|                                           | 20a | For each synthesis, briefly summarise the characteristics and risk of bias among the contributing studies.                                                                                                                                                                                                            | NA            |
| <b>Results of the synthesis</b>           | 20b | Present the results of all statistical syntheses performed. If a meta-analysis has been performed, present for each meta-analysis the summary estimator and its precision (e.g. credible or confidence interval) and measures of statistical heterogeneity. If groups are compared, describe the direction of effect. | 8             |
|                                           | 20c | Present the results of all research on possible causes of heterogeneity between study results.                                                                                                                                                                                                                        | NA            |
|                                           | 20d | Present the results of all sensitivity analyses performed to assess the robustness of the synthesised results.                                                                                                                                                                                                        | 8             |
| <b>Publication bias</b>                   | 21  | Present assessments of the risk of bias due to missing results (arising from publication bias) for each synthesis assessed.                                                                                                                                                                                           | 8             |
| <b>Certainty of evidence</b>              | 22  | Present the assessments of certainty (or confidence) in the body of evidence for each outcome assessed.                                                                                                                                                                                                               | NA            |
| <b>DISCUSSION</b>                         |     |                                                                                                                                                                                                                                                                                                                       |               |
|                                           | 23a | Provide a general interpretation of the results in the context of other evidence.                                                                                                                                                                                                                                     | 8-9           |
| <b>Discussion</b>                         | 23b | Argue the limitations of the evidence included in the review.                                                                                                                                                                                                                                                         | 11-12         |
|                                           | 23c | Argue the limitations of the review processes used.                                                                                                                                                                                                                                                                   | 11-12         |
|                                           | 23d | Argue the implications of the results for practice, policy and future research.                                                                                                                                                                                                                                       | 11-12         |
| <b>OTHER INFORMATION</b>                  |     |                                                                                                                                                                                                                                                                                                                       |               |
| <b>Registration</b>                       | 24a | Provide the registration information for the                                                                                                                                                                                                                                                                          | 3-4           |

|                                                        |     |                                                                                                                                                                                                                                                |       |
|--------------------------------------------------------|-----|------------------------------------------------------------------------------------------------------------------------------------------------------------------------------------------------------------------------------------------------|-------|
|                                                        |     | review, including the name and registration number, or state that the review has not been registered.                                                                                                                                          |       |
| <b>and protocol</b>                                    | 24b | Indicate where the protocol can be accessed, or state that no protocol has been drafted.                                                                                                                                                       | NA    |
|                                                        | 24c | Describe and explain any amendments to the information provided in the registry or protocol.                                                                                                                                                   | NA    |
| <b>Funding</b>                                         | 25  | Describe the sources of financial or non-financial support for the review and the role of funders or sponsors in the review.                                                                                                                   | 12-13 |
| <b>Conflict of interest</b>                            | 26  | Declare the conflicts of interest of the review authors.                                                                                                                                                                                       | 13    |
| <b>Availability of data, codes and other materials</b> | 27  | Specify which of the following are publicly available and where they can be found: data extraction form templates, data extracted from the included studies, data used for all analyses, analysis code, any other material used in the review. | NA    |

NA: Not applicable

**Supplementary Table 2. MOOSE checklist.**

| <b>Item</b>                                      | <b>Recommendation</b>                                                         | <b>Reported on page n°</b> |
|--------------------------------------------------|-------------------------------------------------------------------------------|----------------------------|
| <b>The background report should include</b>      |                                                                               |                            |
| <b>1</b>                                         | Problem definition                                                            | 3                          |
| <b>2</b>                                         | Hypothesis statement                                                          | 3                          |
| <b>3</b>                                         | Description of the study results                                              | 3                          |
| <b>4</b>                                         | Type of exposure or intervention used                                         | 3                          |
| <b>5</b>                                         | Type of study designs used                                                    | 3                          |
| <b>6</b>                                         | Study population                                                              | 3                          |
| <b>The search strategy report should include</b> |                                                                               |                            |
| <b>7</b>                                         | Qualifications of searchers (e.g. librarians and researchers)                 | NA                         |
| <b>8</b>                                         | Search strategy, including time period included in the synthesis and keywords | 4                          |
| <b>9</b>                                         | Effort to include all available studies, including contact with authors       | 4                          |
| <b>10</b>                                        | Databases and records searched                                                | 4                          |
| <b>11</b>                                        | Search software used, name and version, including special features used       | 6                          |
| <b>12</b>                                        | Use of manual search (e.g. reference lists of retrieved articles)             | 4                          |
| <b>13</b>                                        | List of citations located and excluded, including justification               | 4-5, Figure                |

|                                                  |                                                                                                                                                                                                                                                                                  |                |
|--------------------------------------------------|----------------------------------------------------------------------------------------------------------------------------------------------------------------------------------------------------------------------------------------------------------------------------------|----------------|
|                                                  |                                                                                                                                                                                                                                                                                  | S1             |
| 14                                               | Addressing method for articles published in languages other than English                                                                                                                                                                                                         | 4              |
| 15                                               | Method of handling abstracts and unpublished studies                                                                                                                                                                                                                             | NA             |
| 16                                               | Description of any contact with the authors                                                                                                                                                                                                                                      | 5              |
| <b>The methods report should include</b>         |                                                                                                                                                                                                                                                                                  |                |
| 17                                               | Description of the relevance or adequacy of the studies collected to assess the hypothesis to be tested                                                                                                                                                                          | 4-5            |
| 18                                               | Rationale for data selection and coding (e.g. sound clinical principles or appropriateness)                                                                                                                                                                                      | 4-5            |
| 19                                               | Documentation of how data were classified and coded (e.g., multiple raters, blinding, inter-rater reliability)                                                                                                                                                                   | 4-5            |
| 20                                               | Assessment of confounding factors (e.g., case-control comparability in studies where appropriate)                                                                                                                                                                                | NA             |
| 21                                               | Study quality assessment, including blinding of quality assessors, stratification or regression on possible predictors of study outcomes                                                                                                                                         | 5              |
| 22                                               | Heterogeneity assessment                                                                                                                                                                                                                                                         | 5-6            |
| 23                                               | Description of statistical methods (e.g., full description of fixed or random effects models, justification of whether the chosen models take into account predictors of study outcomes, dose-response models or cumulative meta-analysis) in sufficient detail to be replicated | 5-6            |
| 24                                               | Provision of appropriate charts and graphs                                                                                                                                                                                                                                       | 4-5            |
| <b>The report of the results should include</b>  |                                                                                                                                                                                                                                                                                  |                |
| 25                                               | Graph summarising the individual study estimates and the overall estimate                                                                                                                                                                                                        | 6-8, Figure 1  |
| 26                                               | Table with descriptive information on each study included                                                                                                                                                                                                                        | 21-23, Table 1 |
| 27                                               | Results of sensitivity tests (e.g., subgroup analysis)                                                                                                                                                                                                                           | 8, Table S5    |
| 28                                               | Indication of the statistical uncertainty of the results                                                                                                                                                                                                                         | 7-8            |
| <b>The discussion report should include</b>      |                                                                                                                                                                                                                                                                                  |                |
| 29                                               | Quantitative assessment of bias (e.g. publication bias)                                                                                                                                                                                                                          | 8              |
| 30                                               | Justification for exclusion (e.g. exclusion of citations in languages other than English)                                                                                                                                                                                        | 7-8            |
| 31                                               | Quality assessment of included studies                                                                                                                                                                                                                                           | 7, Table S4    |
| <b>The report of the findings should include</b> |                                                                                                                                                                                                                                                                                  |                |
| 32                                               | Consideration of alternative explanations for observed outcomes                                                                                                                                                                                                                  | 8-9            |
| 33                                               | Generalisation of conclusions (i.e. appropriate to the data presented and within the domain of the literature review).                                                                                                                                                           | 8-12           |
| 34                                               | Guidelines for future research                                                                                                                                                                                                                                                   | 11-12          |
| 35                                               | Disclosure of the source of funding                                                                                                                                                                                                                                              | NA             |

NA: Not applicable

**Supplementary Table 3.** Search strategy for the Pubmed database.

|                                       |                                          |
|---------------------------------------|------------------------------------------|
| 1 adult [MeSH Terms]                  | 13 11 OR 12                              |
| 2 adult [All Fields]                  | 14 cardiovascular mortality [All Fields] |
| 3 1 OR 2                              | 15 13 OR 14                              |
| 4 olive oil [All Fields]              | 16 cancer mortality [All Fields]         |
| 5 extra virgin olive oil [All Fields] | 17 15 OR 16                              |
| 6 4 OR 5                              | 18 death [MeSH Terms]                    |
| 7 3 AND 6                             | 19 death [All Fields]                    |
| 8 mortality [Subheading]              | 20 deaths [All Fields]                   |
| 9 mortality [All Fields]              | 21 18 OR 19 O 20                         |
| 10 mortality [MeSH Terms]             | 22 17 OR 21                              |
| 11 8 OR 9 OR 10                       | 23 7 AND 22                              |
| 12 all-cause mortality [All Fields]   |                                          |

**Supplementary Table 4.** Assessment of study quality using the National Heart, Lung, and Blood Institute's Observational Cohort and Cross-sectional Study Tool.

| Reference                        | 1 | 2 | 3  | 4 | 5  | 6 | 7  | 8  | 9 | 10 | 11 | 12 | 13 | 14 | Quality |
|----------------------------------|---|---|----|---|----|---|----|----|---|----|----|----|----|----|---------|
| <i>D'Amicis et al.</i> 1999 (24) | Y | N | NR | N | NR | Y | NA | N  | Y | NA | Y  | NR | NA | Y  | Poor    |
| <i>Barzi et al.</i> 2003 (25)    | Y | Y | NR | Y | Y  | Y | Y  | Y  | Y | Y  | Y  | NR | NR | Y  | Good    |
| <i>Naska et al.</i> 2009 (26)    | Y | N | NR | N | NR | Y | NR | NR | Y | N  | Y  | NR | NR | Y  | Poor    |
| <i>Buckland et al.</i> 2011 (27) | Y | Y | Y  | N | Y  | Y | Y  | Y  | Y | N  | Y  | NR | NR | Y  | Good    |
| <i>Regidor et al.</i> 2012 (28)  | Y | Y | Y  | Y | Y  | Y | Y  | N  | Y | Y  | Y  | NR | NR | Y  | Good    |
| <i>Buckland et al.</i>           | Y | Y | Y  | Y | Y  | Y | Y  | N  | Y | N  | Y  | NR | NR | Y  | Good    |

|                                            |   |   |    |   |   |   |   |   |   |   |   |    |    |    |      |
|--------------------------------------------|---|---|----|---|---|---|---|---|---|---|---|----|----|----|------|
| <i>al.</i> 2012<br>(29)                    |   |   |    |   |   |   |   |   |   |   |   |    |    |    |      |
| <i>Guasch-Ferré et al.</i><br>2014 (30)    | Y | Y | NR | Y | Y | Y | Y | Y | Y | N | Y | Y  | NR | Y  | Good |
| <i>Prinelli et al.</i><br>2015<br>(31)     | Y | Y | Y  | Y | Y | Y | Y | N | Y | N | Y | NR | NR | Y  | Good |
| <i>Stefler et al.</i><br>2017 (32)         | Y | Y | Y  | N | Y | Y | Y | N | Y | N | Y | NR | NR | Y  | Fair |
| <i>Sadeghi et al.</i><br>2021<br>(33)      | Y | Y | NR | Y | Y | Y | Y | Y | Y | N | Y | NR | NR | Y  | Good |
| <i>Zhang et al.</i><br>2021 (34)           | Y | Y | Y  | Y | Y | Y | Y | Y | Y | N | Y | NR | Y  | Y  | Good |
| <i>Guasch-Ferré et al.</i><br>2022 (35)    | Y | Y | Y  | Y | Y | Y | Y | Y | Y | N | Y | NR | NR | Y  | Good |
| <i>Donat-Vargas et al.</i><br>2023<br>(36) | Y | Y | Y  | Y | Y | Y | Y | Y | Y | N | Y | NR | NR | Y  | Good |
| <i>Bonfiglio et al.</i><br>2023<br>(37)    | Y | Y | Y  | Y | Y | Y | Y | Y | Y | Y | Y | NR | Y  | NR | Good |

*Items: 1. Was the research question or objective in this paper clearly stated?; 2. Was the study population clearly specified and defined?; 3. Was the participation rate of eligible persons at least 50%?; 4. Were all the subjects selected or recruited from the same or similar populations (including the same time period)? Were inclusion and exclusion criteria for being in the study*

prespecified and applied uniformly to all participants?; 5. Was a sample size justification, power description, or variance and effect estimates provided?; 6. For the analyses in this paper, were the exposure(s) of interest measured prior to the outcome(s) being measured?; 7. Was the timeframe sufficient so that one could reasonably expect to see an association between exposure and outcome if it existed?; 8. For exposures that can vary in amount or level, did the study examine different levels of the exposure as related to the outcome (e.g., categories of exposure, or exposure measured as continuous variable)?; 9. Were the exposure measures (independent variables) clearly defined, valid, reliable, and implemented consistently across all study participants?; 10. Was the exposure(s) assessed more than once over time?; 11. Were the outcome measures (dependent variables) clearly defined, valid, reliable, and implemented consistently across all study participants?; 12. Were the outcome assessors blinded to the exposure status of participants?; 13. Was loss to follow-up after baseline 20% or less?; 14. Were key potential confounding variables measured and adjusted statistically for their impact on the relationship between exposure(s) and outcome(s)?; CD, cannot determine; N: no; NA, not applicable; NR: not reported; Y: yes.

**Supplementary Table 5.** Meta-regression models as a function of mean age, percentage of women and intervention follow-up for all-cause, cardiovascular and cancer mortality.

|                                 | <b>Coefficient</b> | <b>95% CI</b> | <b>p valor</b> |
|---------------------------------|--------------------|---------------|----------------|
| <b>All-cause mortality</b>      |                    |               |                |
| Mean age                        | -0.0006            | -0.015, 0.013 | 0.905          |
| Percentage of women             | -0.0005            | -0.002, 0.001 | 0.363          |
| Years of follow-up              | 0.0024             | -0.007, 0.011 | 0.551          |
| <b>Cardiovascular mortality</b> |                    |               |                |
| Mean age                        | -0.0208            | -0.175, 0.134 | 0.337          |
| Percentage of women             | -0.0008            | 0.497, 1.229  | 0.736          |
| Years of follow-up              | 0.0027             | -0.022, 0.027 | 0.778          |
| <b>Cancer mortality</b>         |                    |               |                |
| Mean age                        | 0.0075             | -0.193, 0.208 | 0.718          |
| Percentage of women             | 0.0001             | -0.003, 0.003 | 0.869          |
| Years of follow-up              | -0.0045            | -0.018, 0.009 | 0.300          |

CI: Confidence Interval



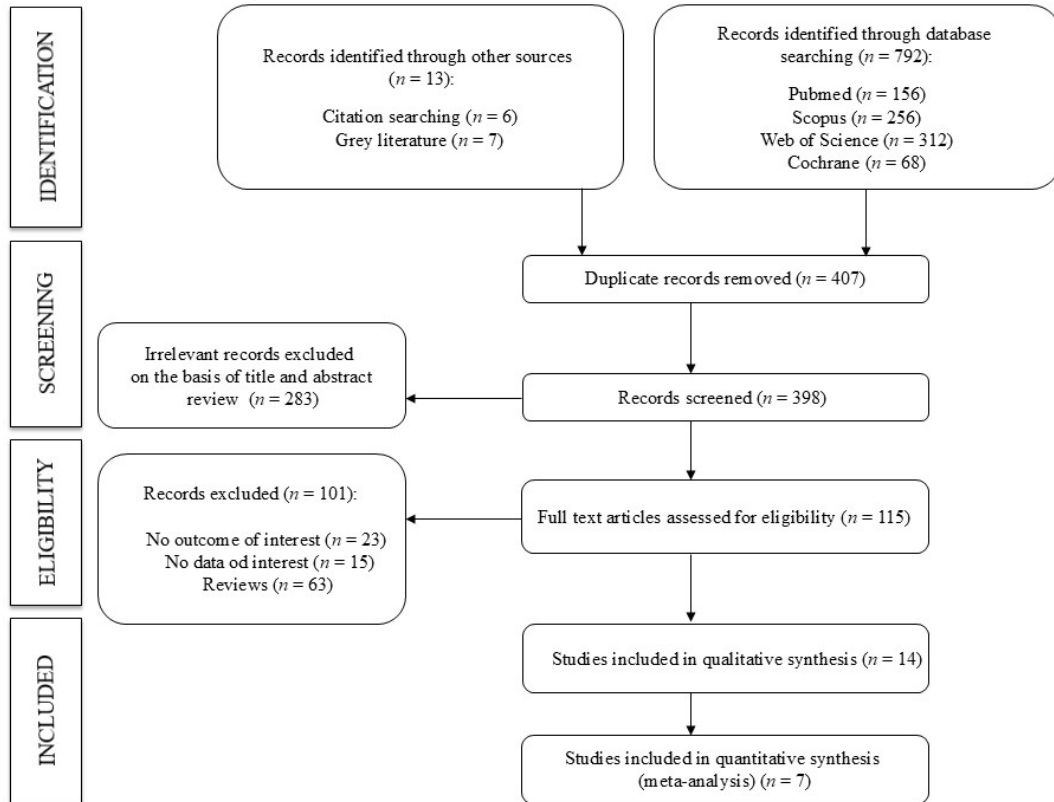

**Supplementary Figure 1.** Flow chart: search strategy.

**A**

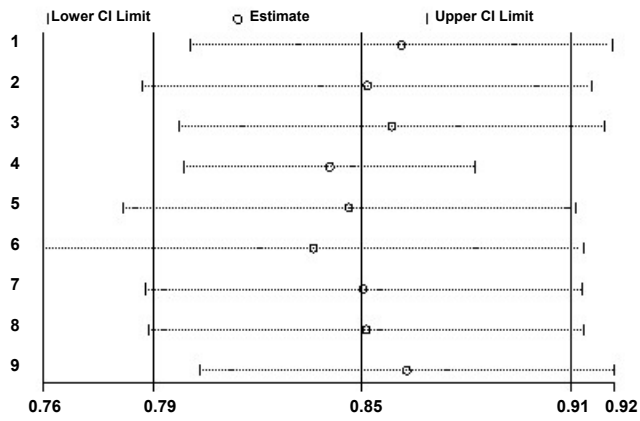

**B**

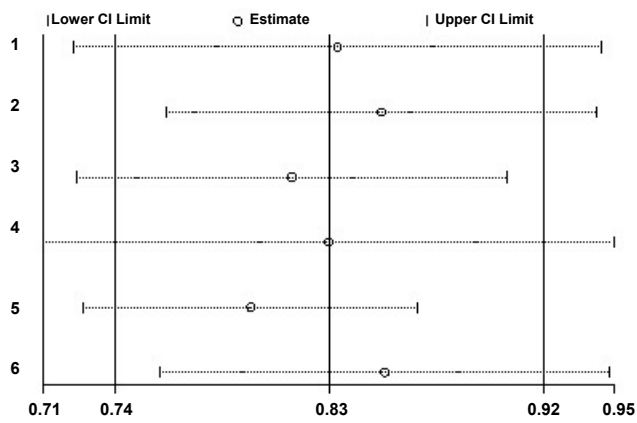

**C**

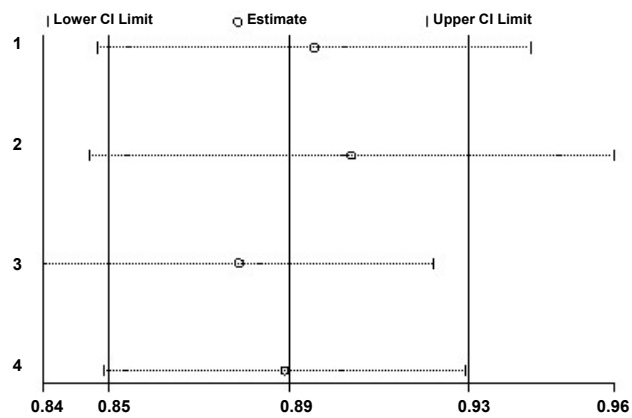

**Supplementary Figure 2. Sensitivity analysis. A) Studies on all-cause mortality. B)**

**Cardiovascular mortality studies. C) Cancer mortality studies.**

**A) All-causes**

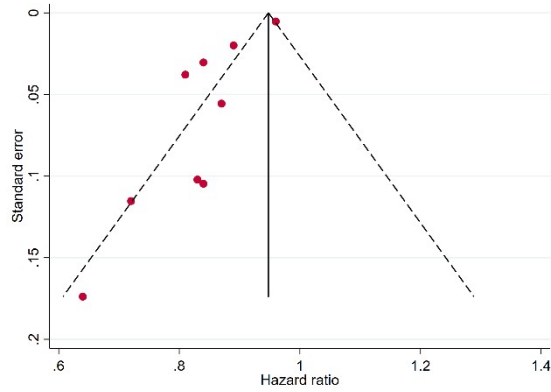

**B) Cardiovascular**

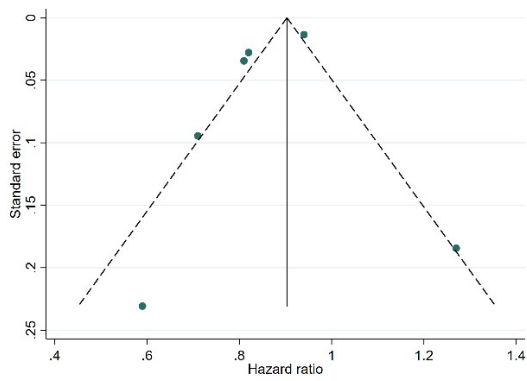

**C) Cancer**

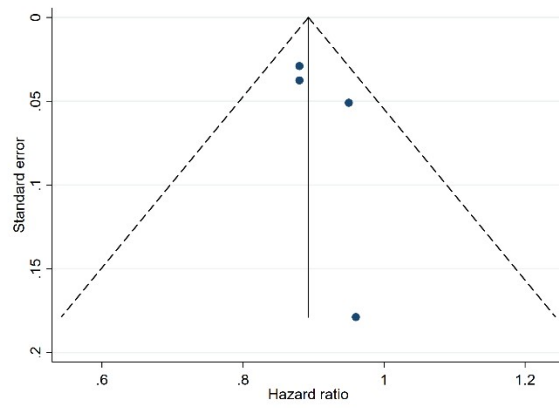

**Supplementary Figure 3.** Assessment of meta-analysis publication bias by *funnel plots*. **A)** Studies on all-cause mortality. **B)** Cardiovascular mortality studies. **C)** Cancer mortality studies.
